# Supplementary material
Source: MDPI journal article supplement (https://www.mdpi.com/2624-831X/5/1/8)
Supplement: s1 [file s1]

# A Wearable Internet of Things Device for Non-invasive Remote Monitoring of Vital Signs Related to Heart Failure

Sheikh MA Iqbal<sup>1,2</sup>, Mary Ann Leavitt<sup>3</sup>, Imadeldin Mahgoub<sup>1</sup>, and Waseem Asghar<sup>1,2,4</sup>\*

<sup>1</sup> Department of Electrical Engineering & Computer Science, Florida Atlantic University, Boca Raton, FL 33431

<sup>2</sup> Asghar-Lab, Micro and Nanotechnology in Medicine, College of Engineering and Computer Science, Boca Raton, FL 33431, USA

<sup>3</sup> Christine E. Lynn College of Nursing, Florida Atlantic University, Boca Raton, FL 33431

<sup>4</sup> Department of Biological Sciences (Courtesy appointment), Florida Atlantic University, Boca Raton, FL 33431, USA

\* Correspondence: wasghar@fau.edu

## 1. Arduino Code:

The code for the device along with the Gerber files of the printed circuit board (PCB) can be found here:

<https://github.com/ShkhAsher/A-body-mounted-wearable-sensor-for-monitoring-heart-failure-vitals.git>

## 2. Subject Data:

**Subject 1:**

**a**

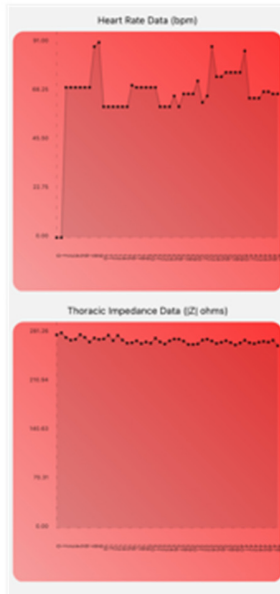

**b**

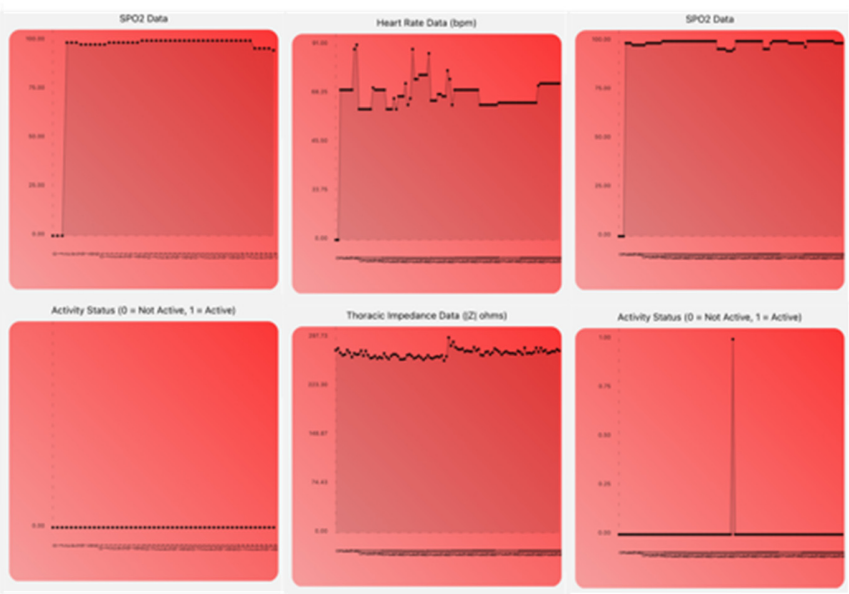

**c**

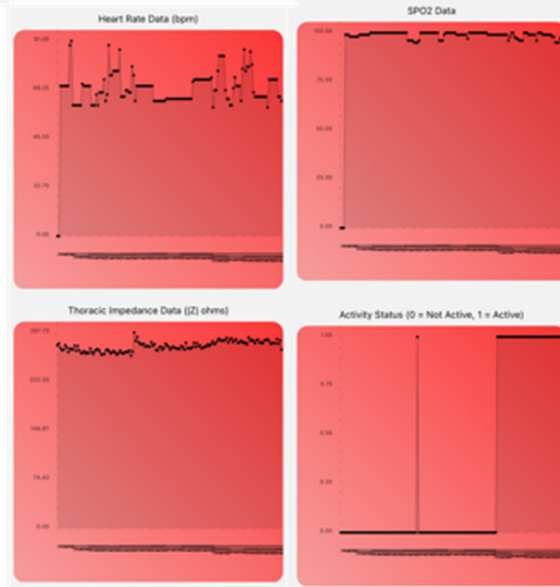

a Subject 1 parameters while sitting b. Patient 1 parameters while standing c. Patient 1 parameters while walking.

**Subject2:**

**a**

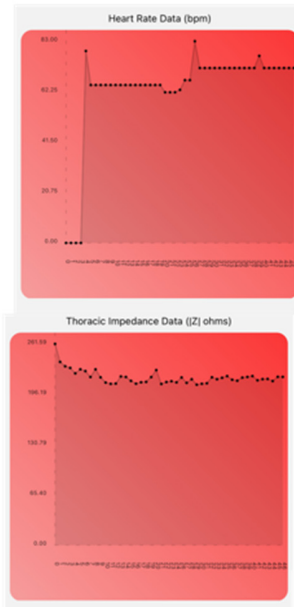

**b**

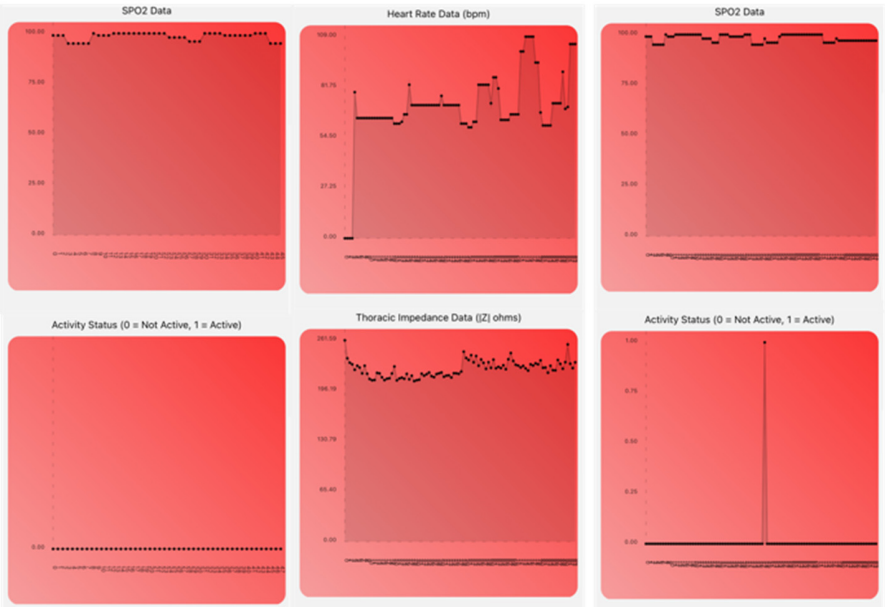

**c**

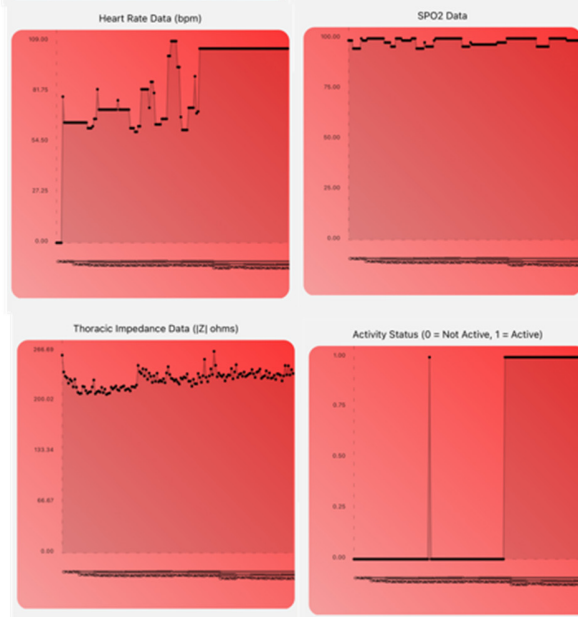

a Subject 2 parameters while sitting b. Patient 1 parameters while standing c. Patient 1 parameters while walking.

**Subject 3:**

**a**

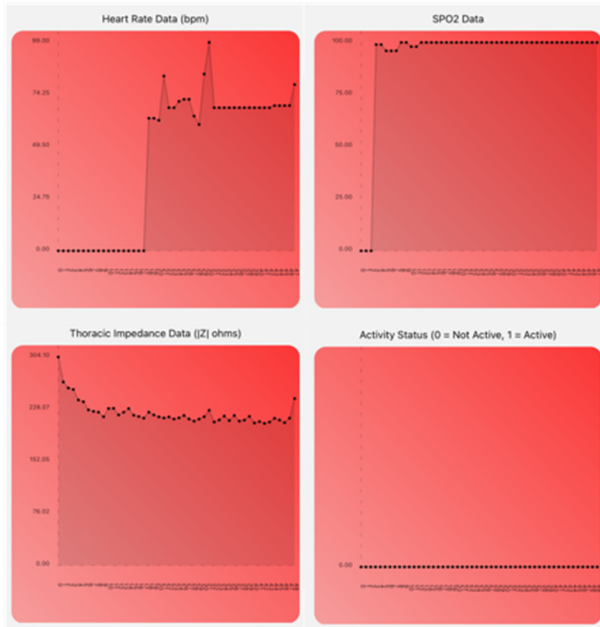

**b**

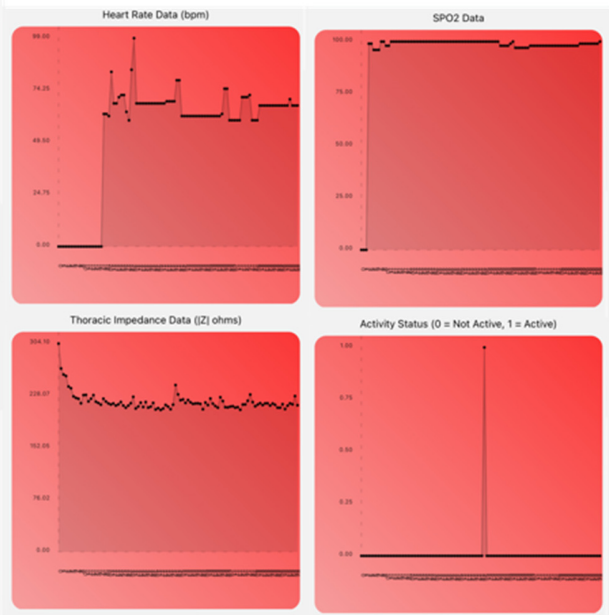

**c**

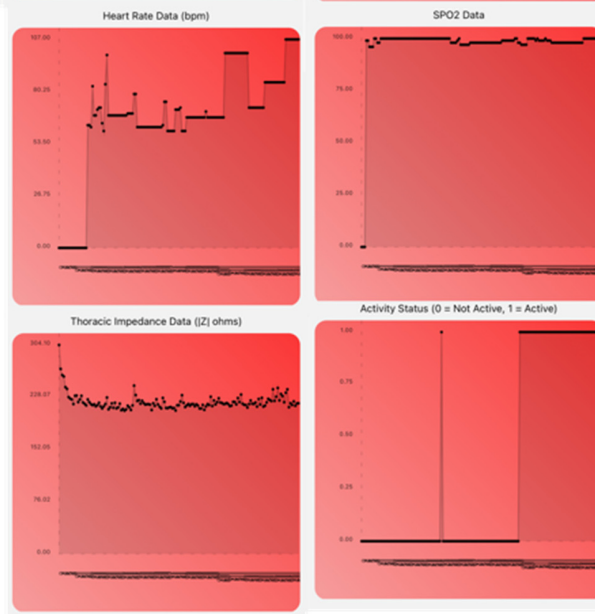

a Subject 3 parameters while sitting b. Patient 1 parameters while standing c. Patient 1 parameters while walking.

**Subject 4:**

**a**

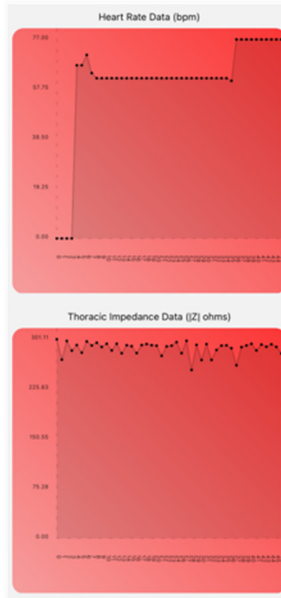

**b**

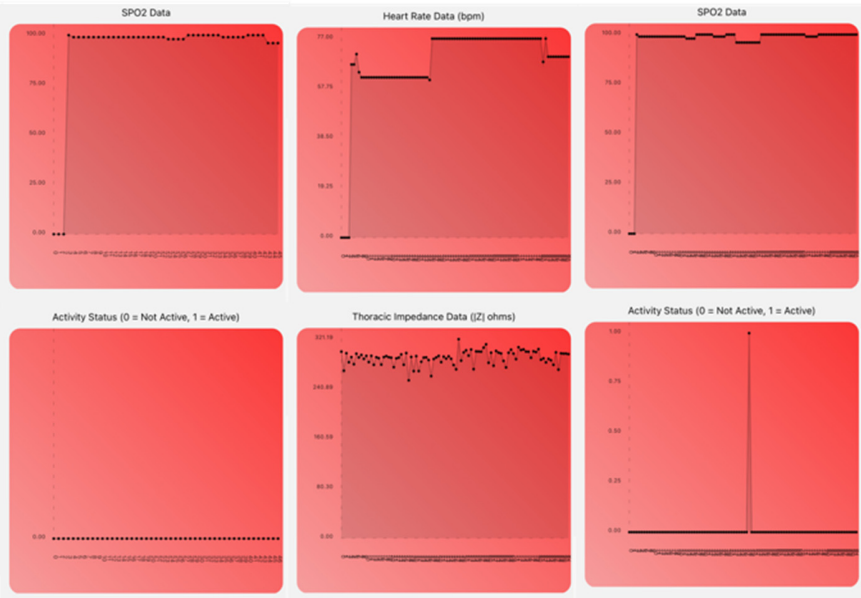

**c**

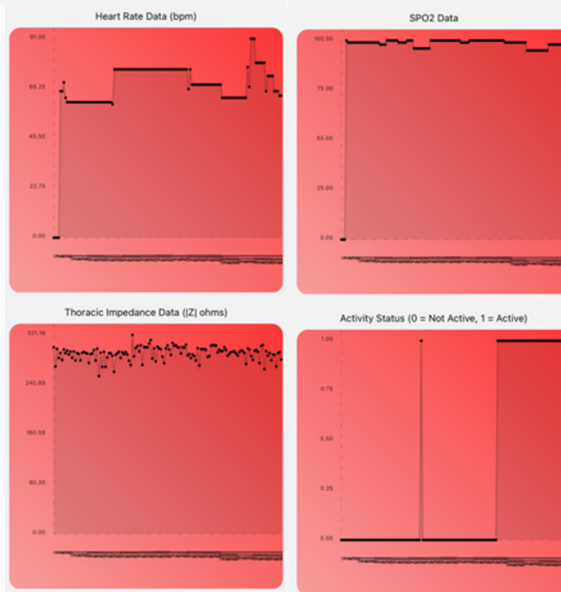

a Subject 4 parameters while sitting b. Patient 1 parameters while standing c. Patient 1 parameters while walking.

**Subject 5:**

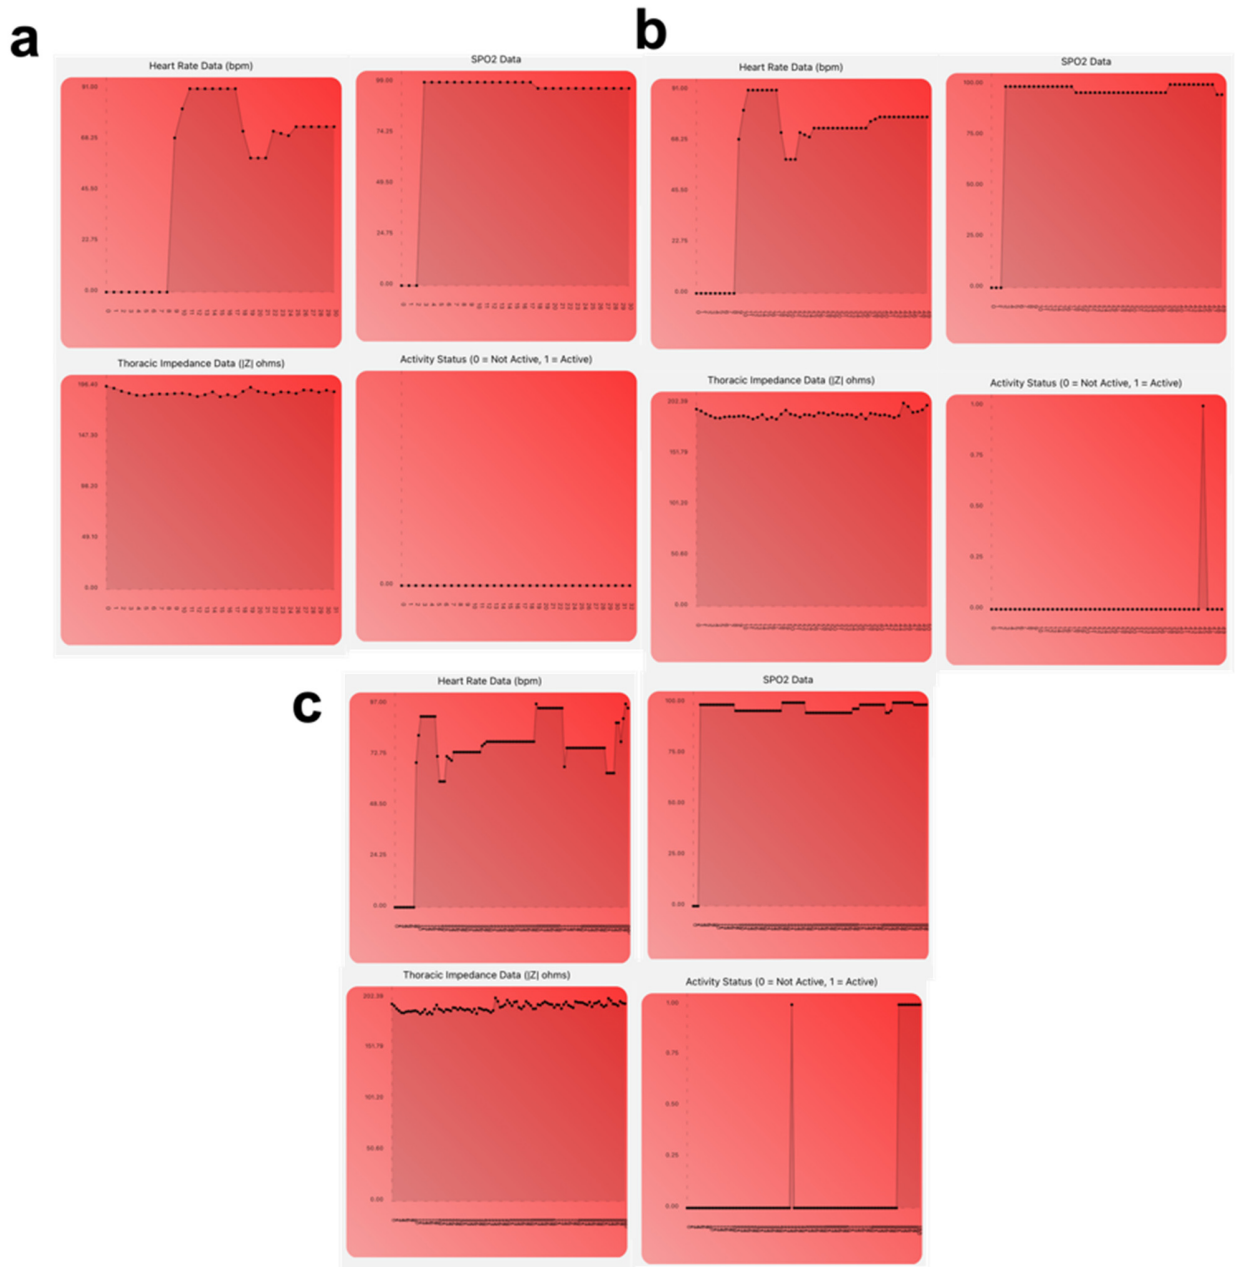

a Subject 5 parameters while sitting b. Patient 1 parameters while standing c. Patient 1 parameters while walking.



**Subject 6:**

**a**

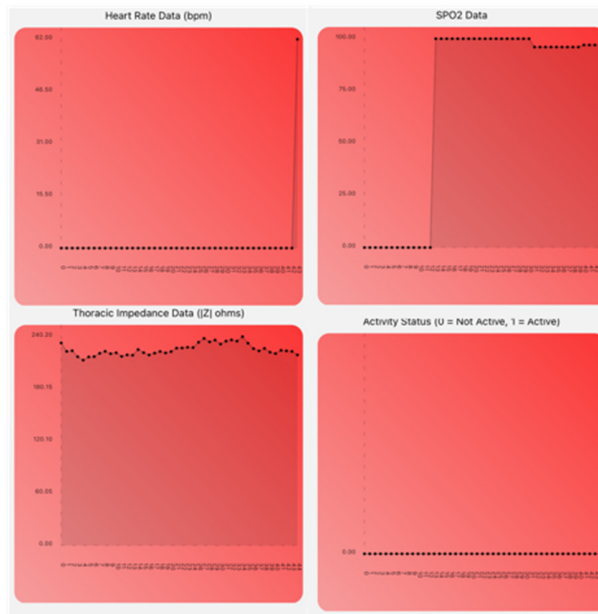

**b**

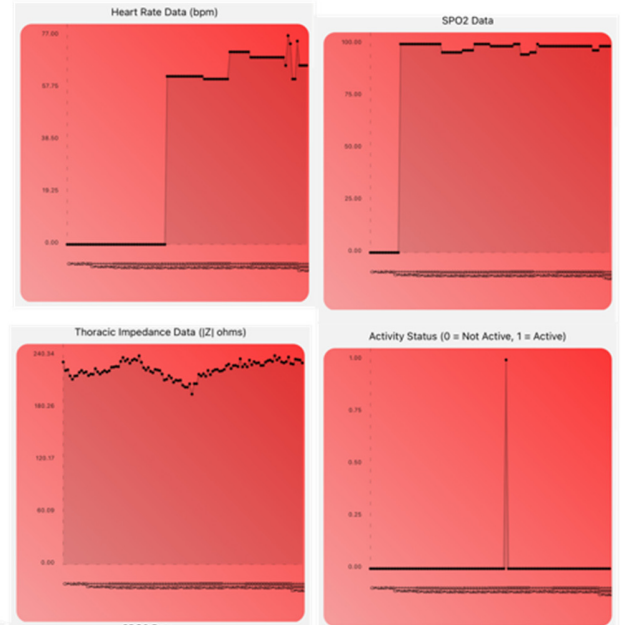

**c**

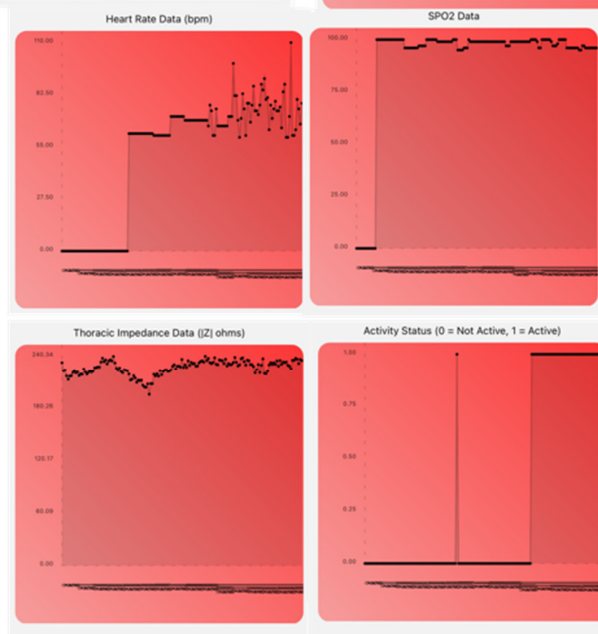

a Subject 6 parameters while sitting b. Patient 1 parameters while standing c. Patient 1 parameters while walking.

**Subject 7:**

**a**

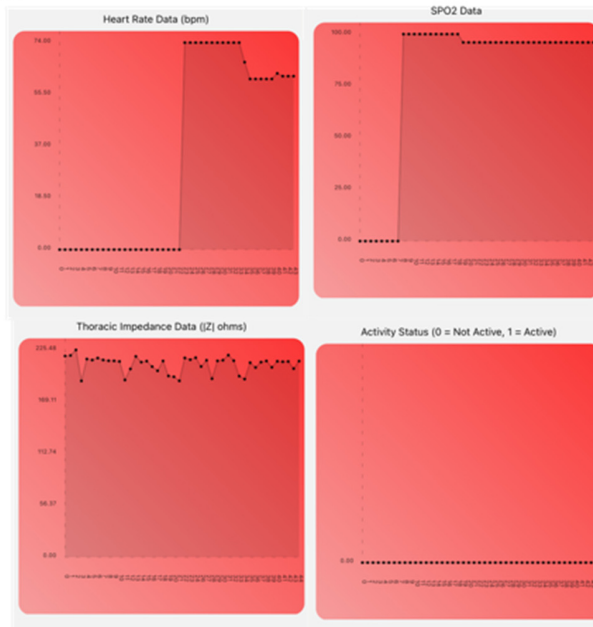

**b**

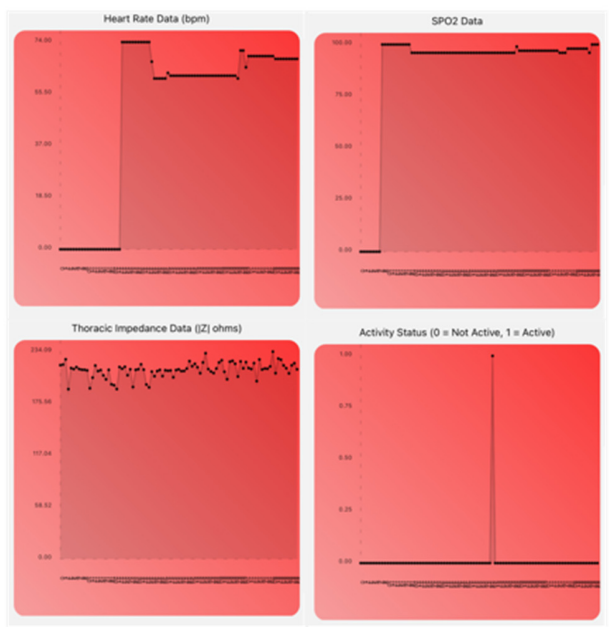

**c**

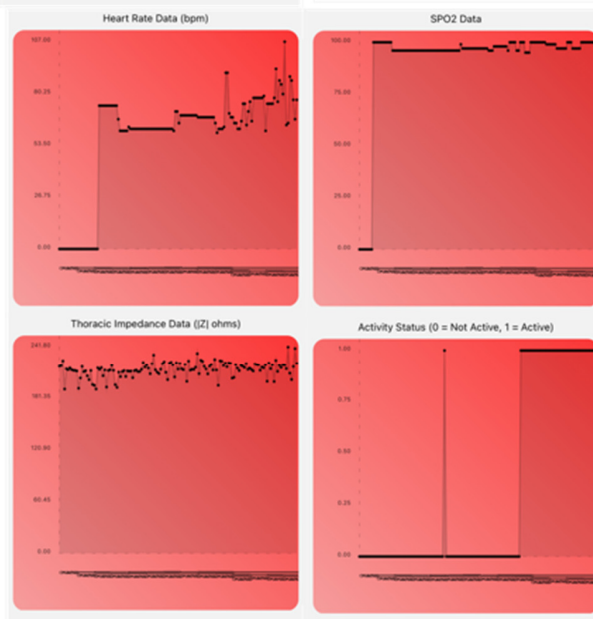

a Subject 7 parameters while sitting b. Patient 1 parameters while standing c. Patient 1 parameters while walking.



**Subject 8:**

**a**

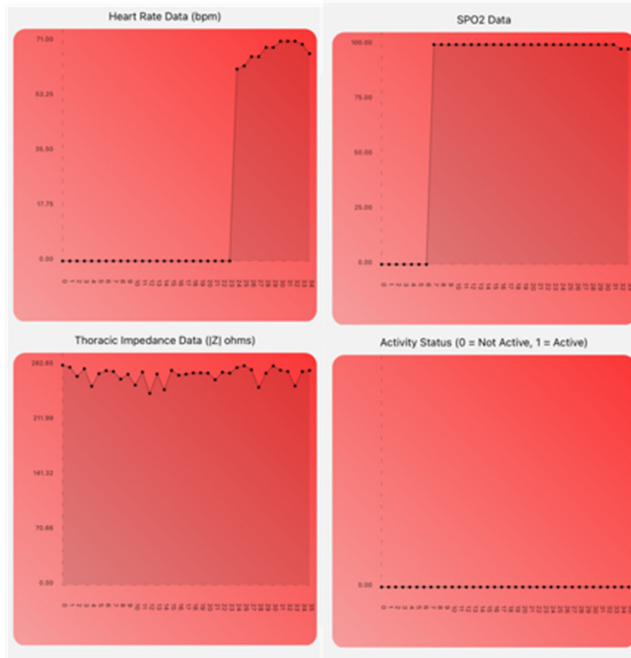

**b**

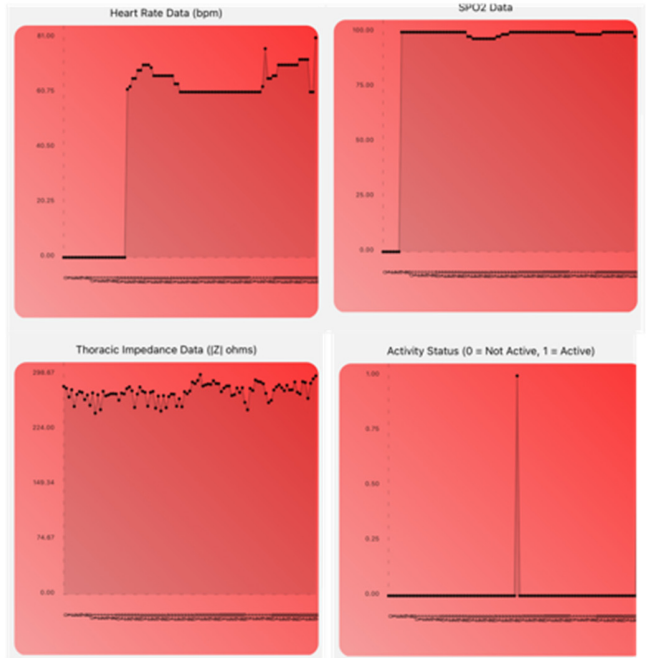

**c**

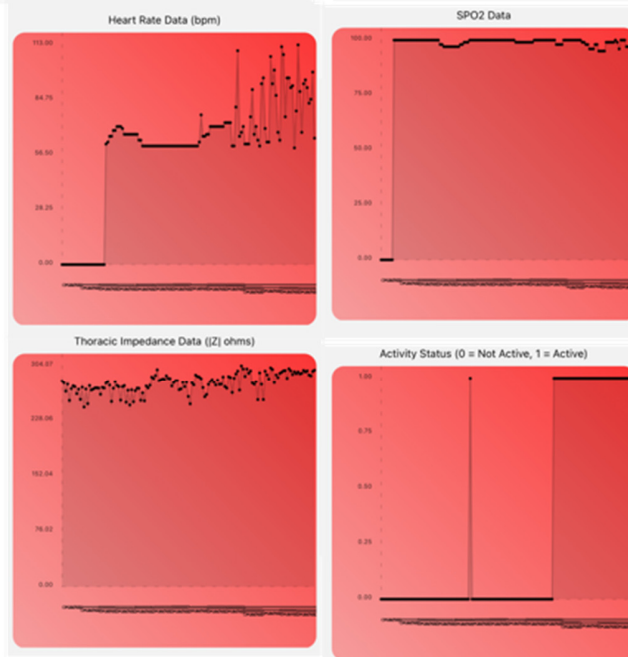

a Subject 8 parameters while sitting b. Patient 1 parameters while standing c. Patient 1 parameters while walking.

**Subject 9:**

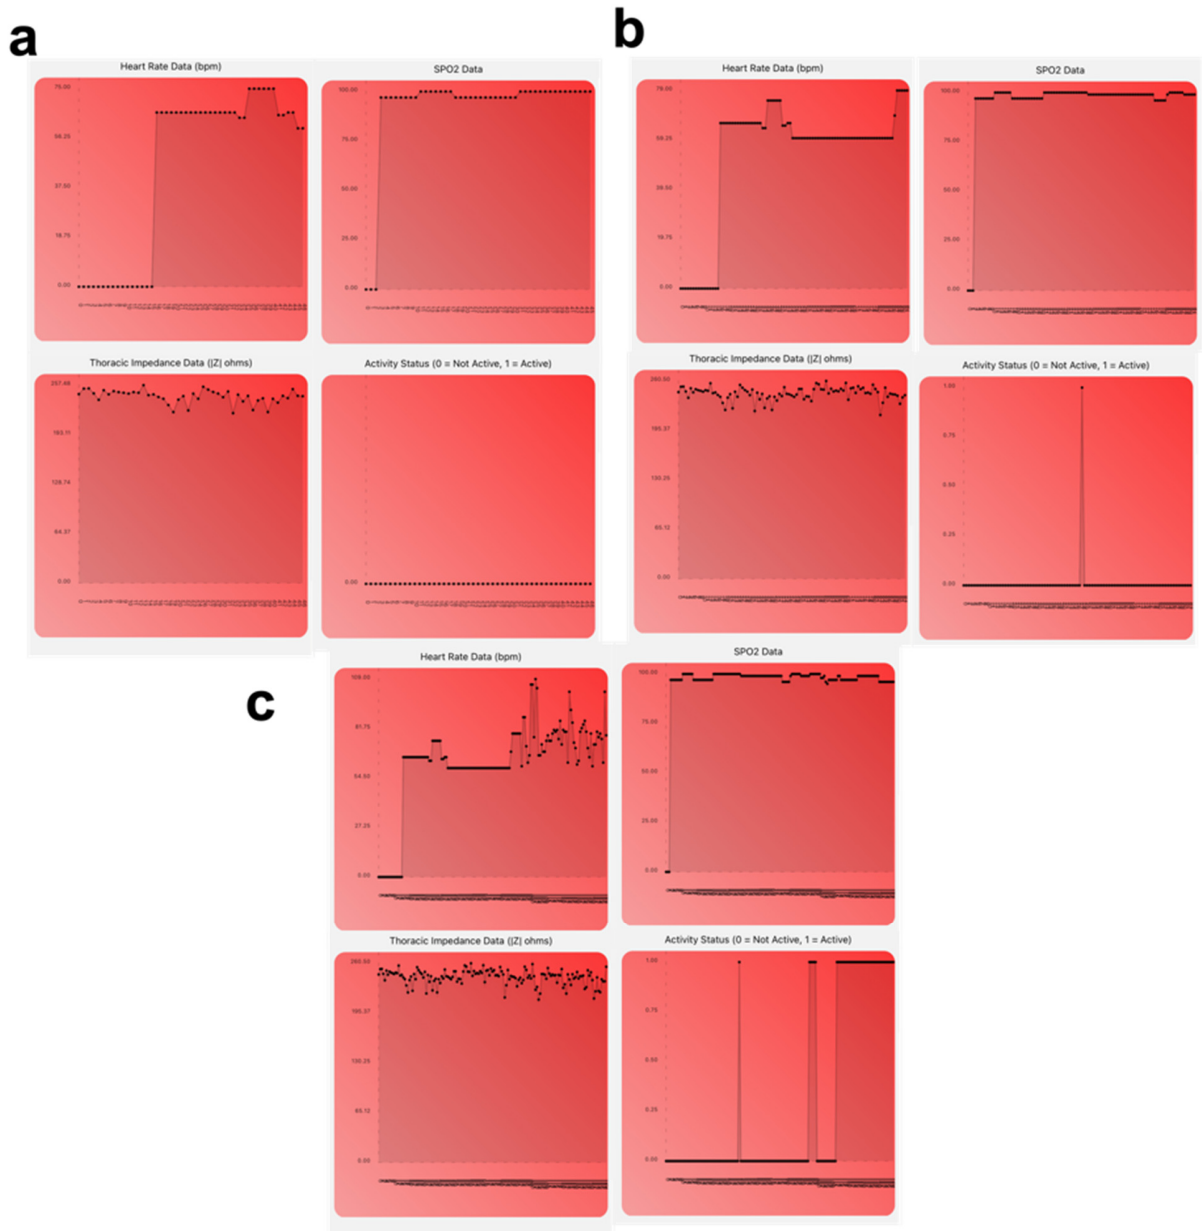

a Subject 9 parameters while sitting b. Patient 1 parameters while standing c. Patient 1 parameters while walking.

**Subject 10:**

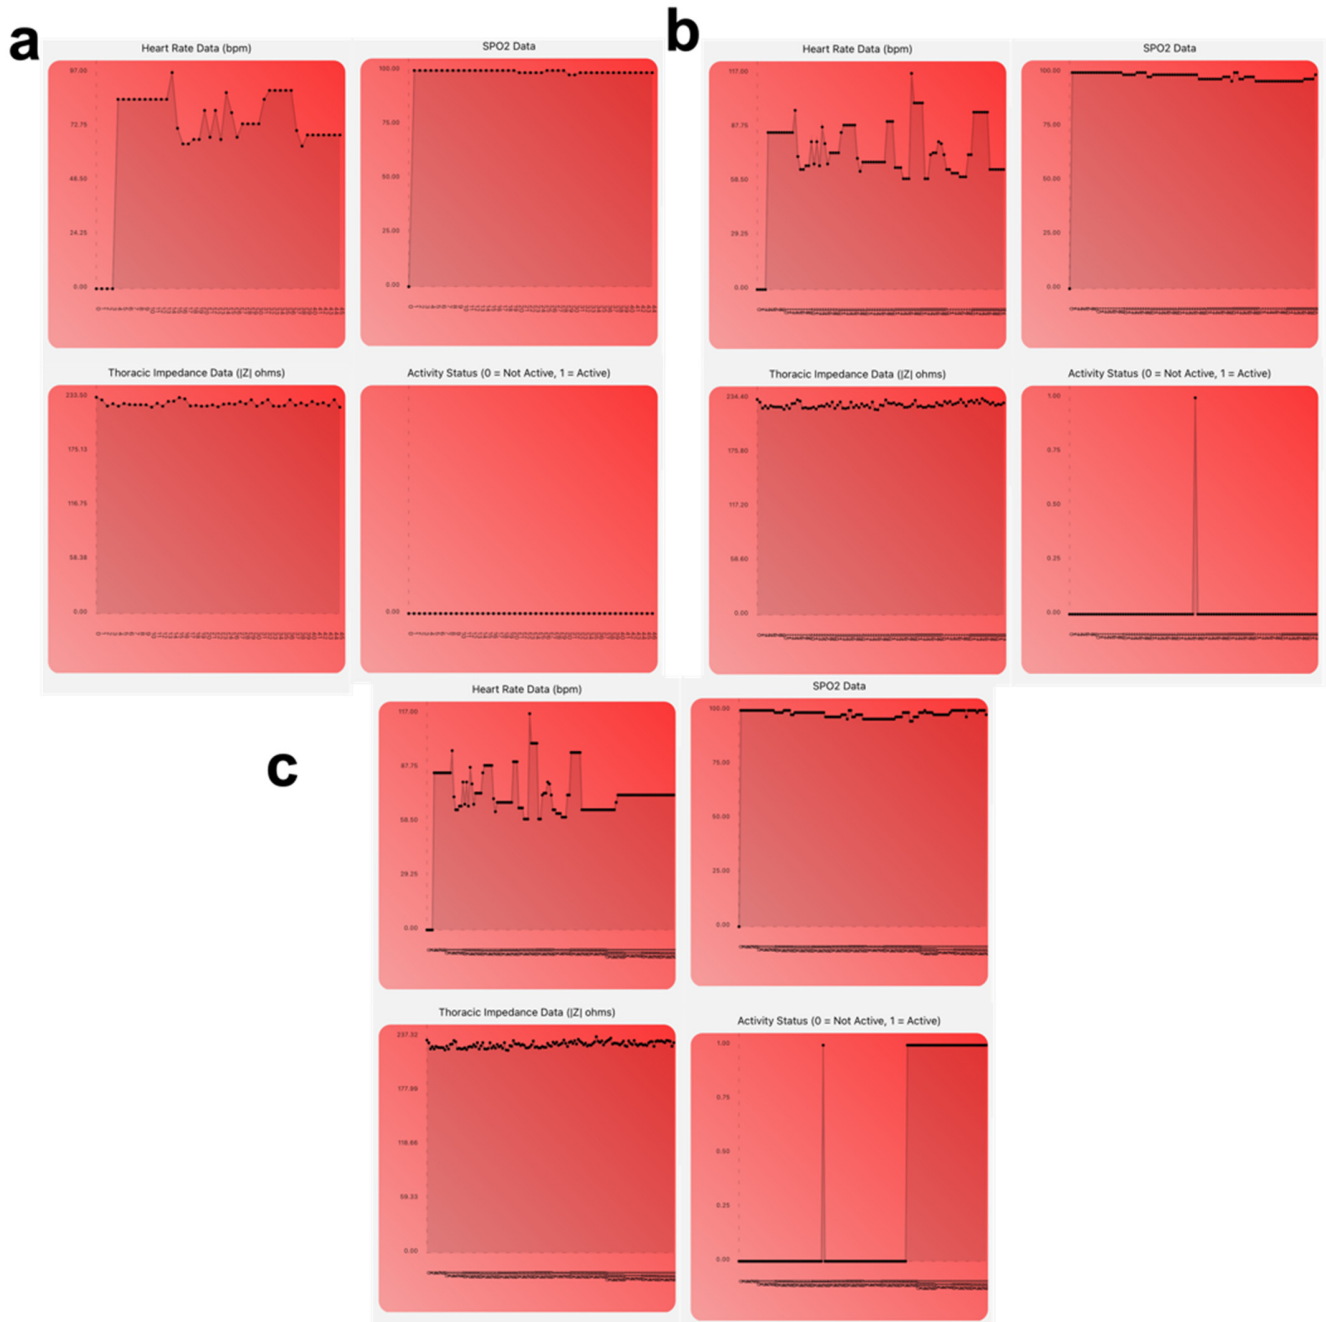

a Subject 10 parameters while sitting b. Patient 1 parameters while standing c. Patient 1 parameters while walking.
